# Supplementary material
Source: PubMed Central journal article supplement (PMC6986909)
Supplement: EMS84949-supplement-Supplementary_information_figure_1.pdf [file EMS84949-supplement-Supplementary_information_figure_1.pdf]

Figure 2: SIRV1 gp29 (AcrIII-1) single turnover kinetics

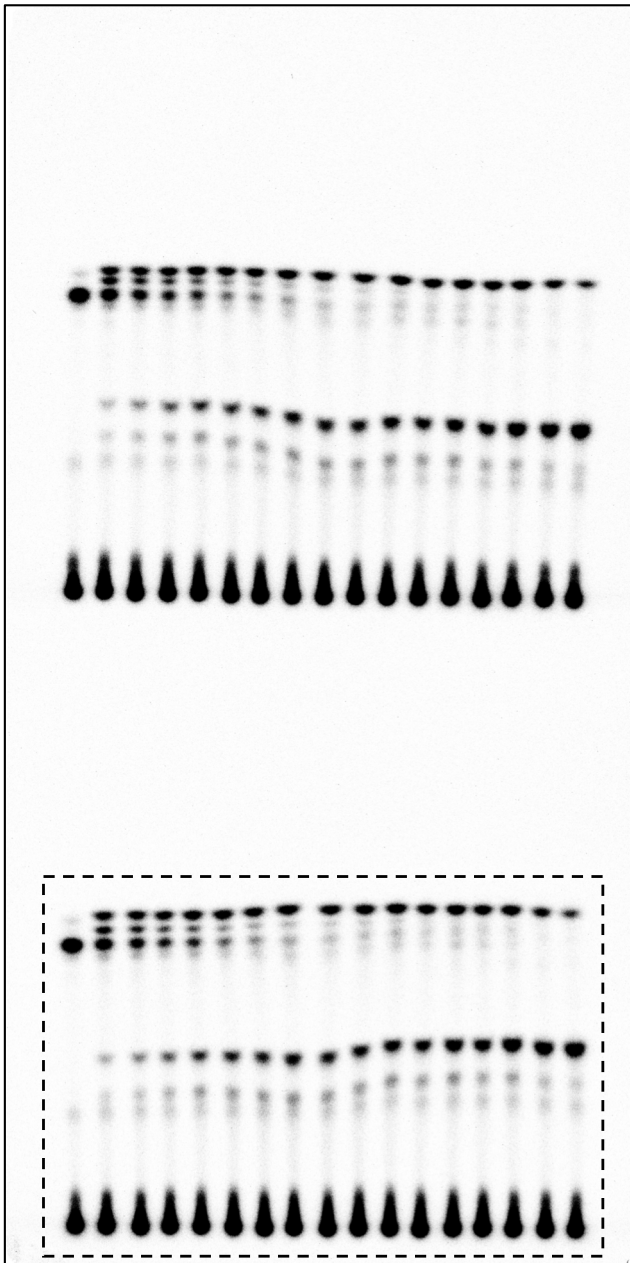

SIRV1 gp29 biological replicate 1: technical replicate 1 (top) & 2 (bottom)

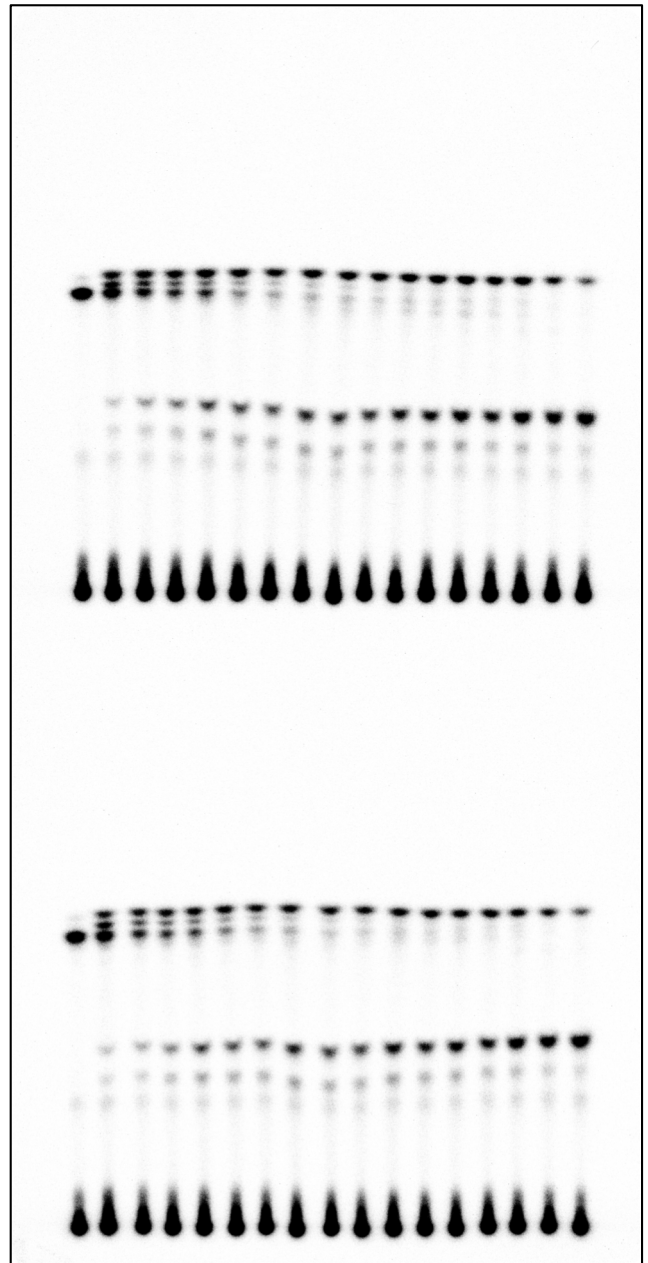

SIRV1 gp29 biological replicate 1: technical replicate 3 (top) & biological replicate 2: technical replicate 1 (bottom)

Figure 2: SIRV1 gp29 (AcrIII-1) single turnover kinetics

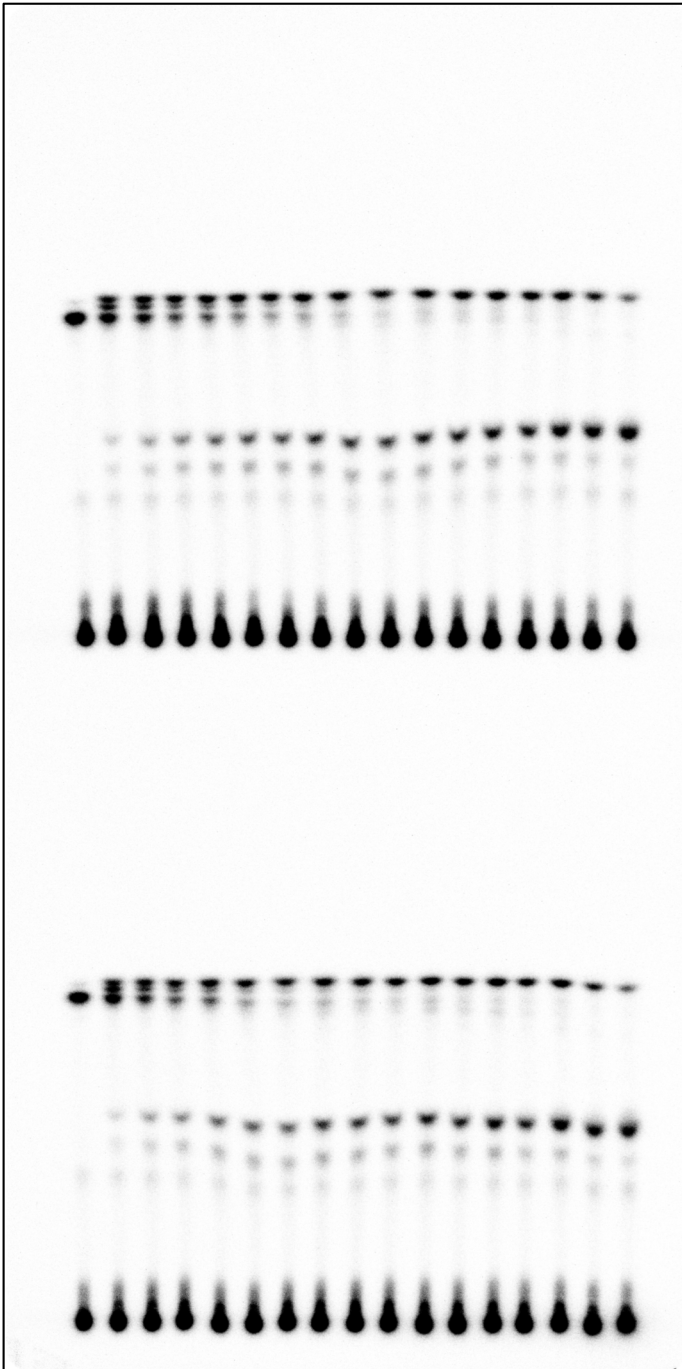

SIRV1 gp29 biological replicate 2: technical replicate 2 (top) & 3 (bottom)

Figure 2 : YddF (AcrIII-1) single turnover kinetics

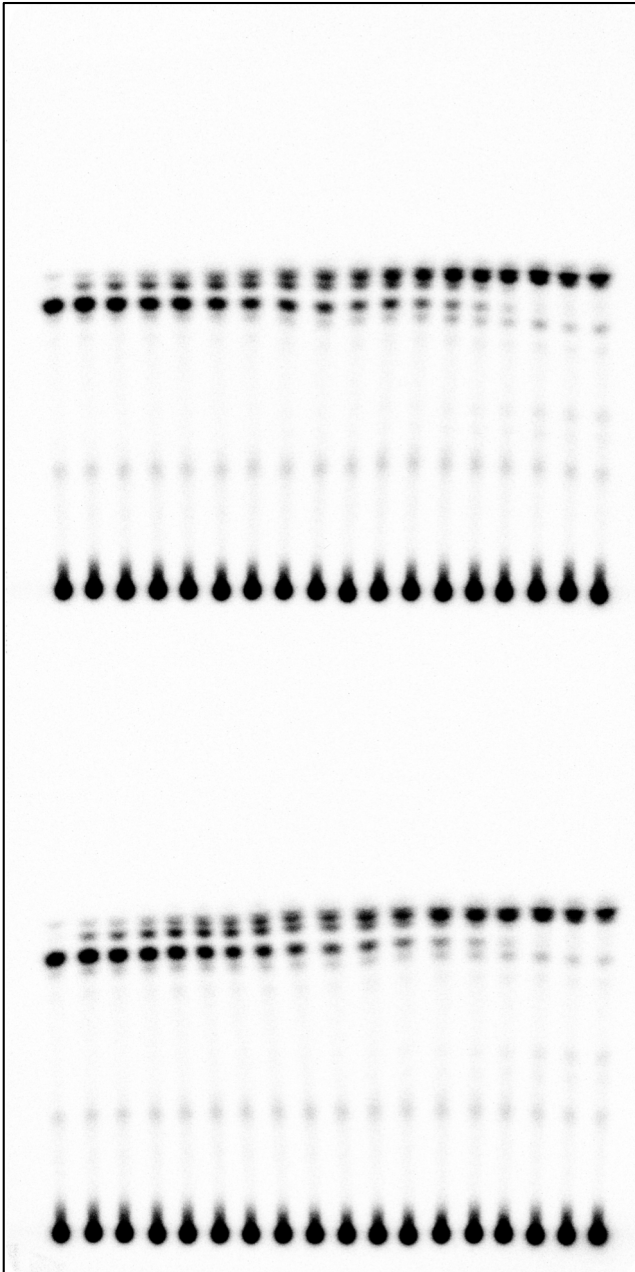

*B. subtilis* YddF replicate 1 (top) and 2 (bottom)

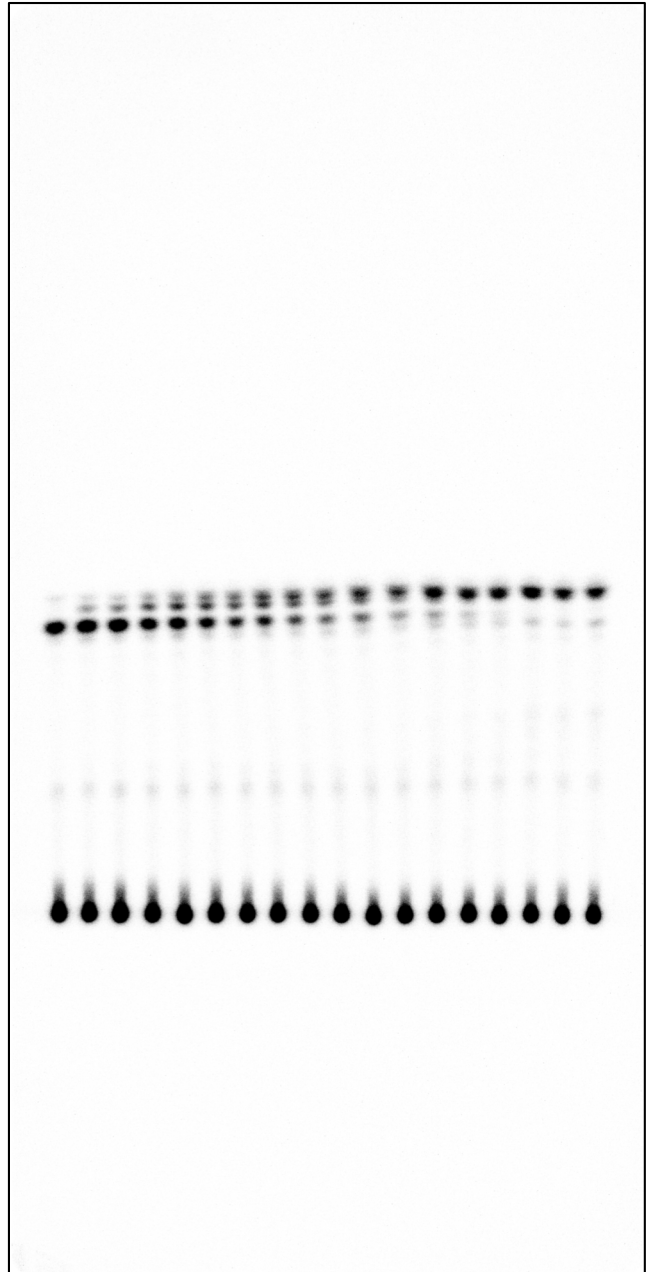

*B. subtilis* YddF replicates 3

Figure 2: Sso2081 (Crn1) single turnover kinetics

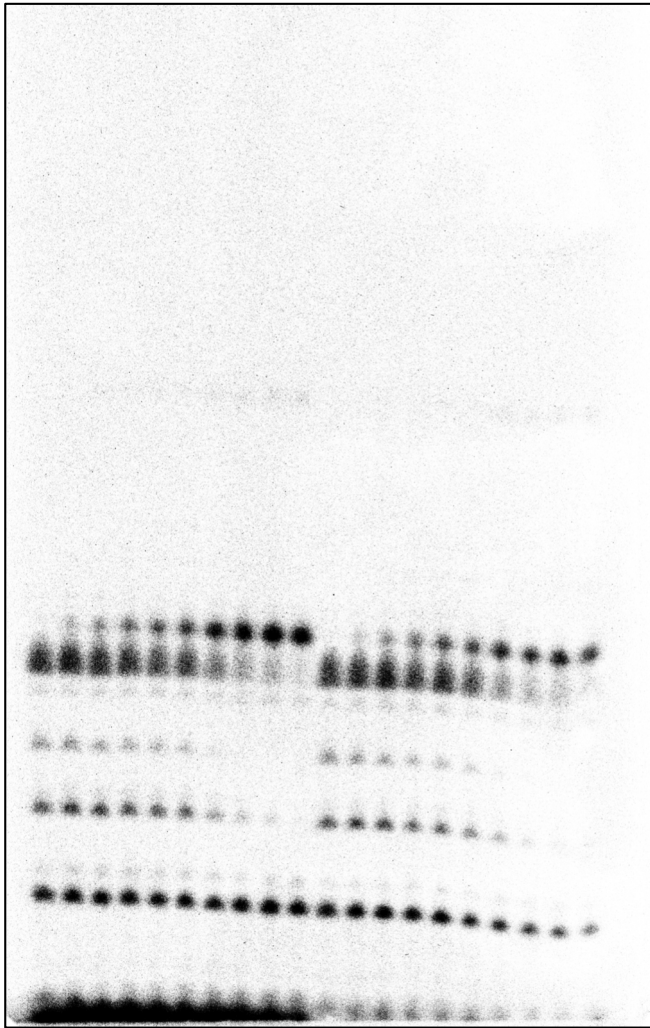

Sso2081 replicate 1    Sso2081 replicate 2

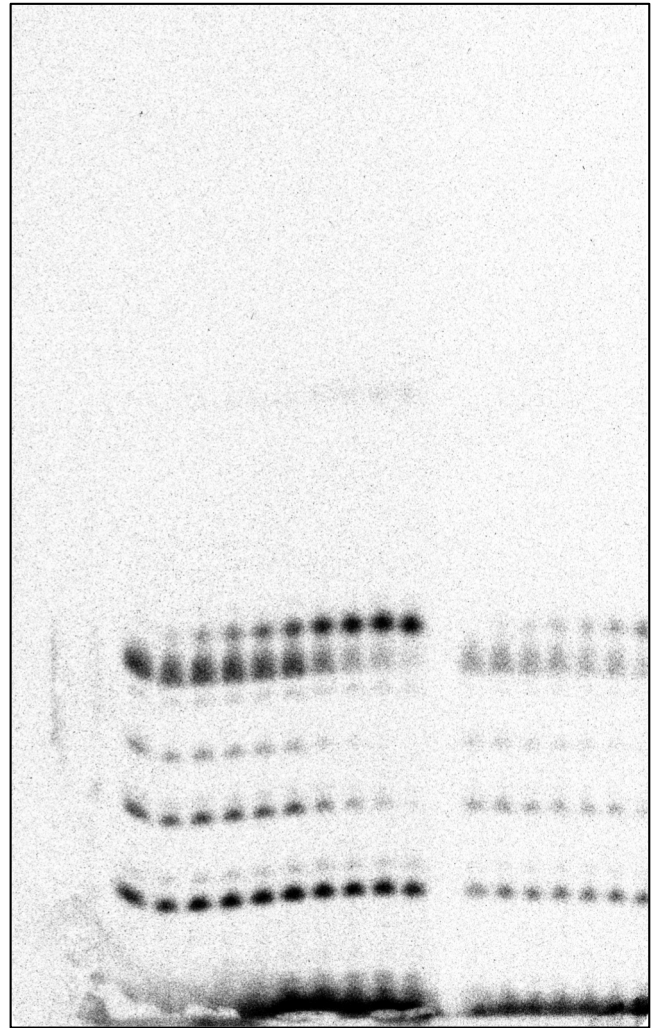

Sso2081 replicate 3

Figure 2: SsoCsm, SsoCsx1 and AcrIII-1 or Crn1 coupled deactivation assays

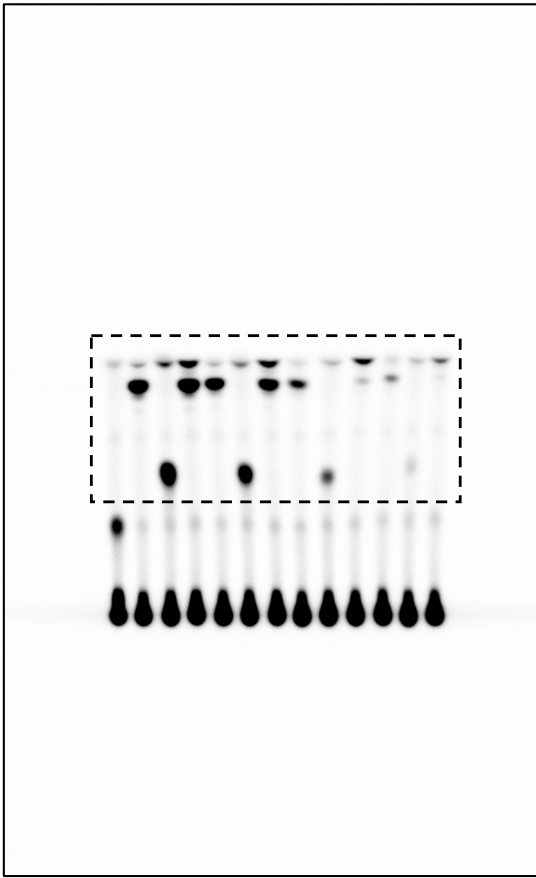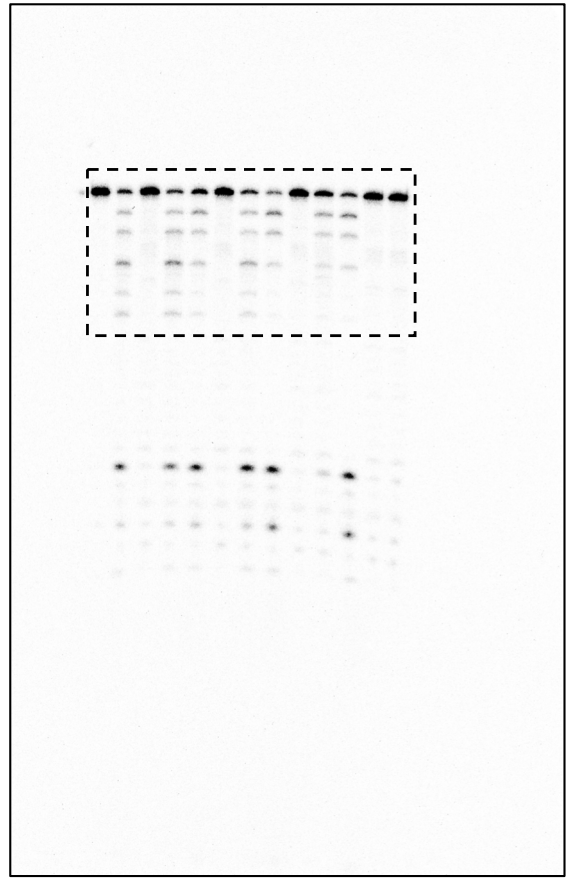

Replicate 3

Figure 2: SsoCsm, SsoCsx1 and AcrIII-1 or Crn1 coupled deactivation assays result representative replicates (TLC)

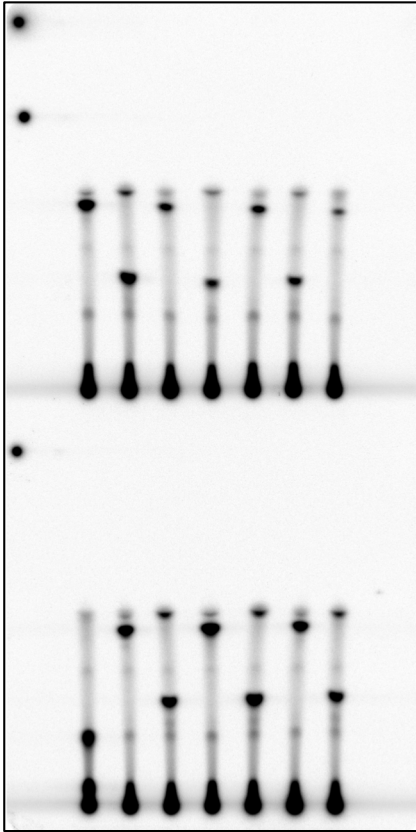

Replicate 1 part 1

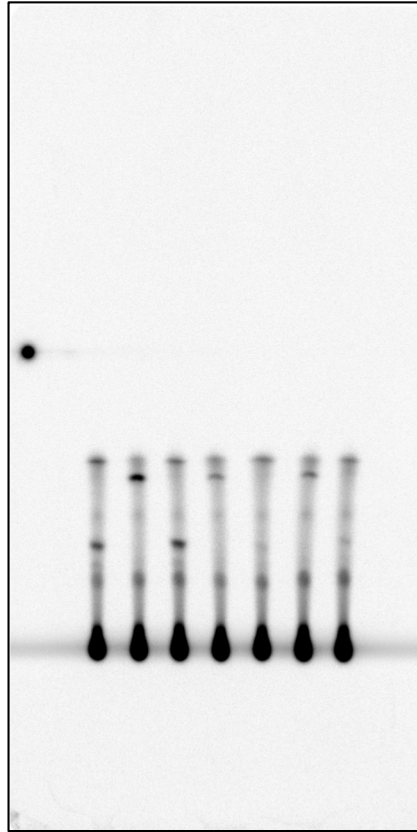

Replicate 1 part 2

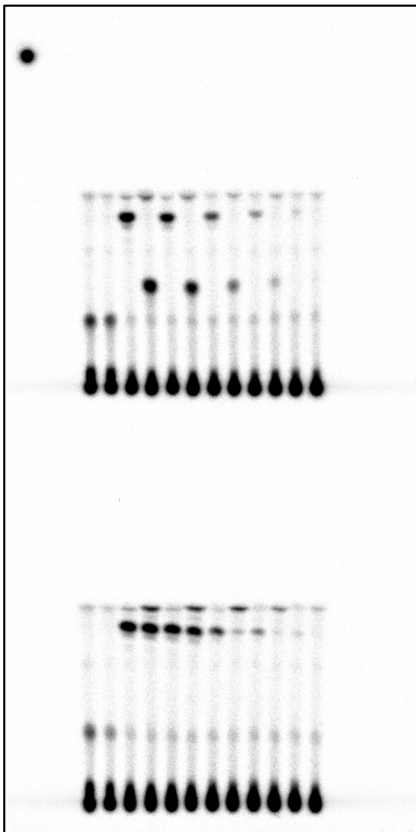

Replicate 2

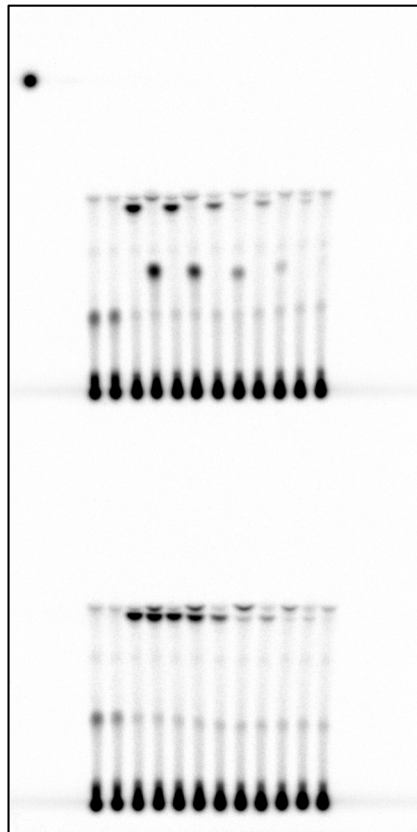

Replicate 3

Extended figure 4. SIRV1 gp29 and YddF cA<sub>4</sub> and cA<sub>6</sub> degradation kinetics visualised under 254 nm UV light after TLC

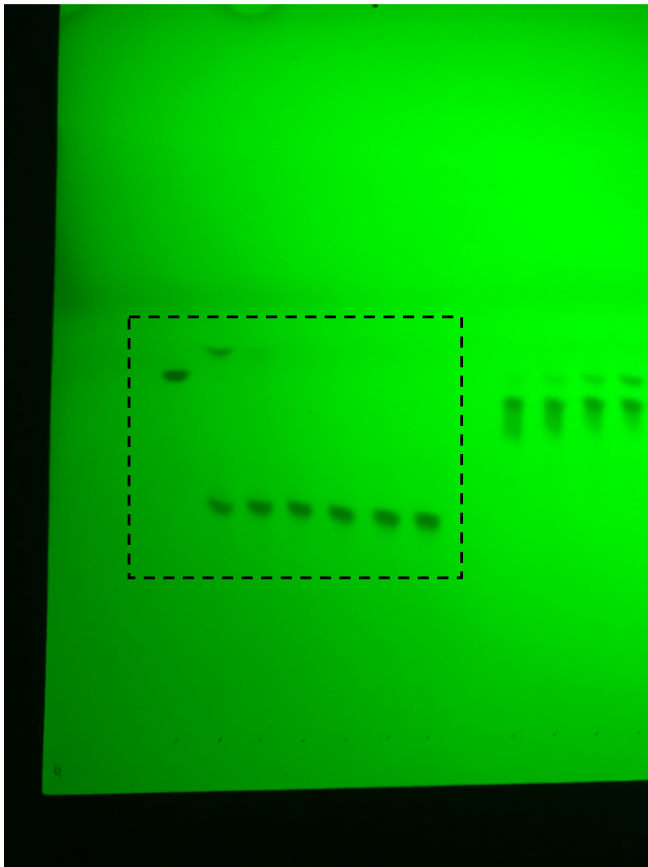

SIRV gp29 + cA<sub>4</sub>

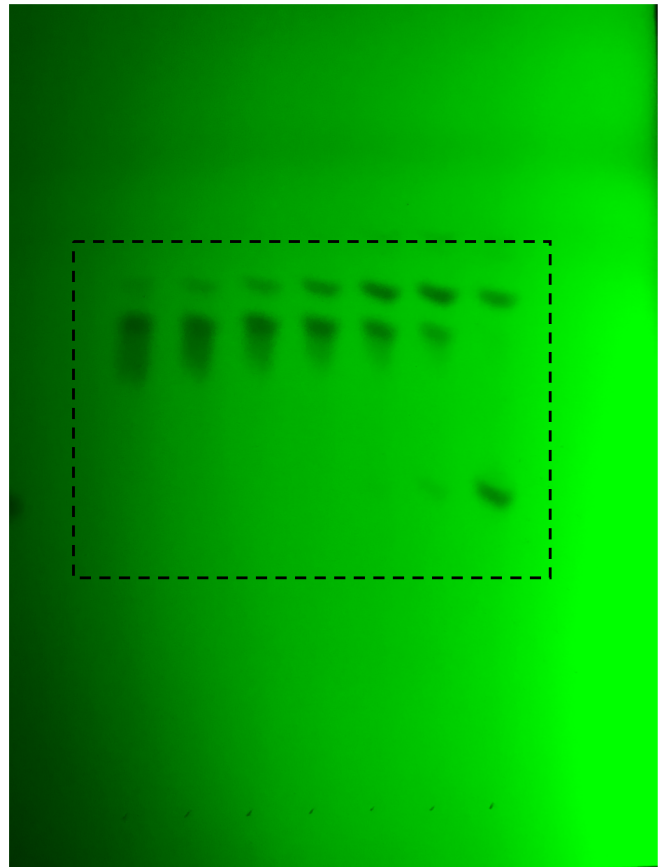

SIRV gp29 + cA<sub>6</sub>

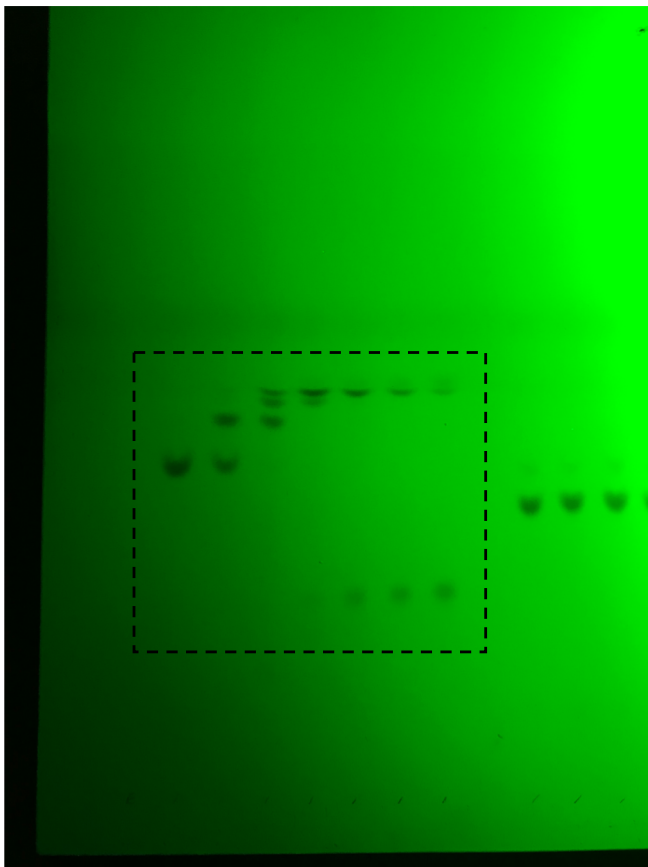

YddF + cA<sub>4</sub>

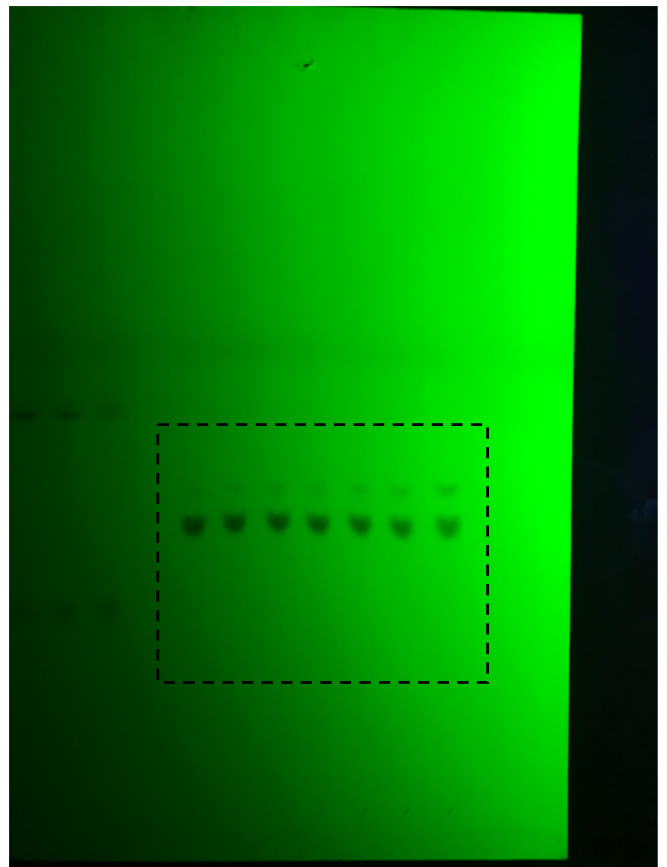

YddF + cA<sub>6</sub>

Extended figure 4 : SsoCsx1 and AcrIII-1 or Crn1 cA<sub>4</sub> protection assays

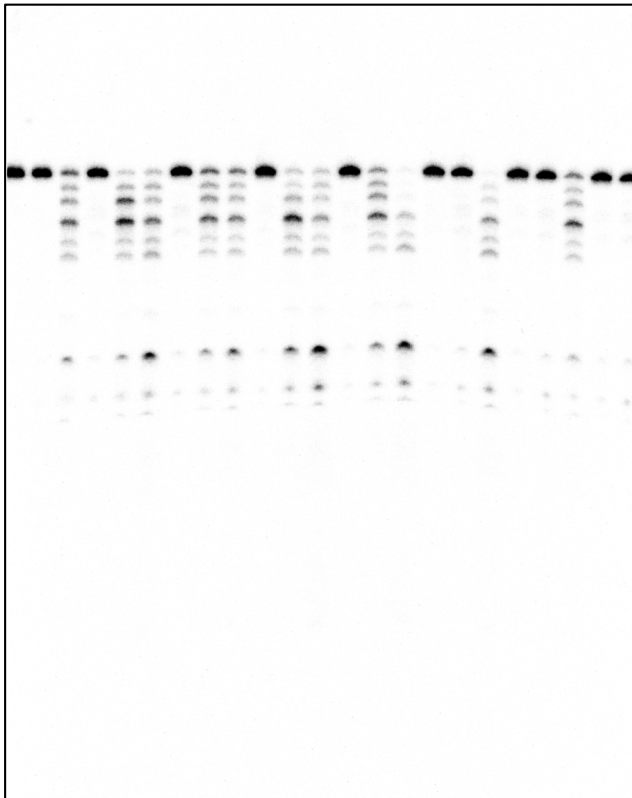

Replicate 1

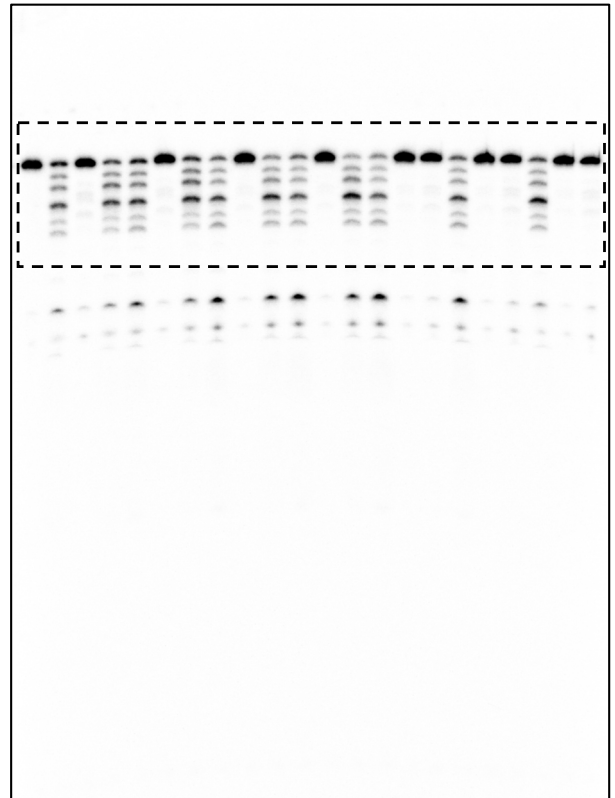

Replicate 2

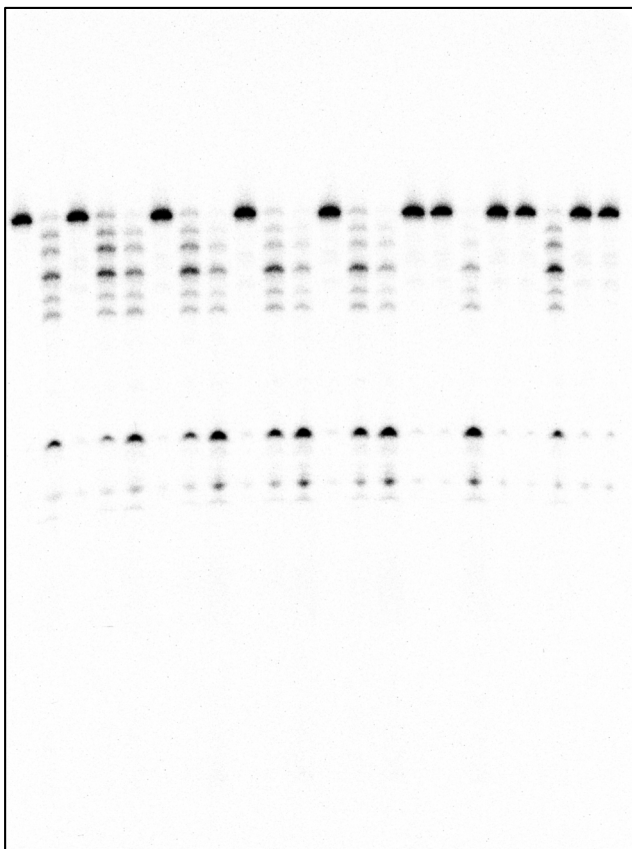

Replicate 3



Extended figure 6. Single turnover kinetics of  $cA_4$  degradation by SIRV1 gp29 H47A in the absence or presence of 0.5 M imidazole

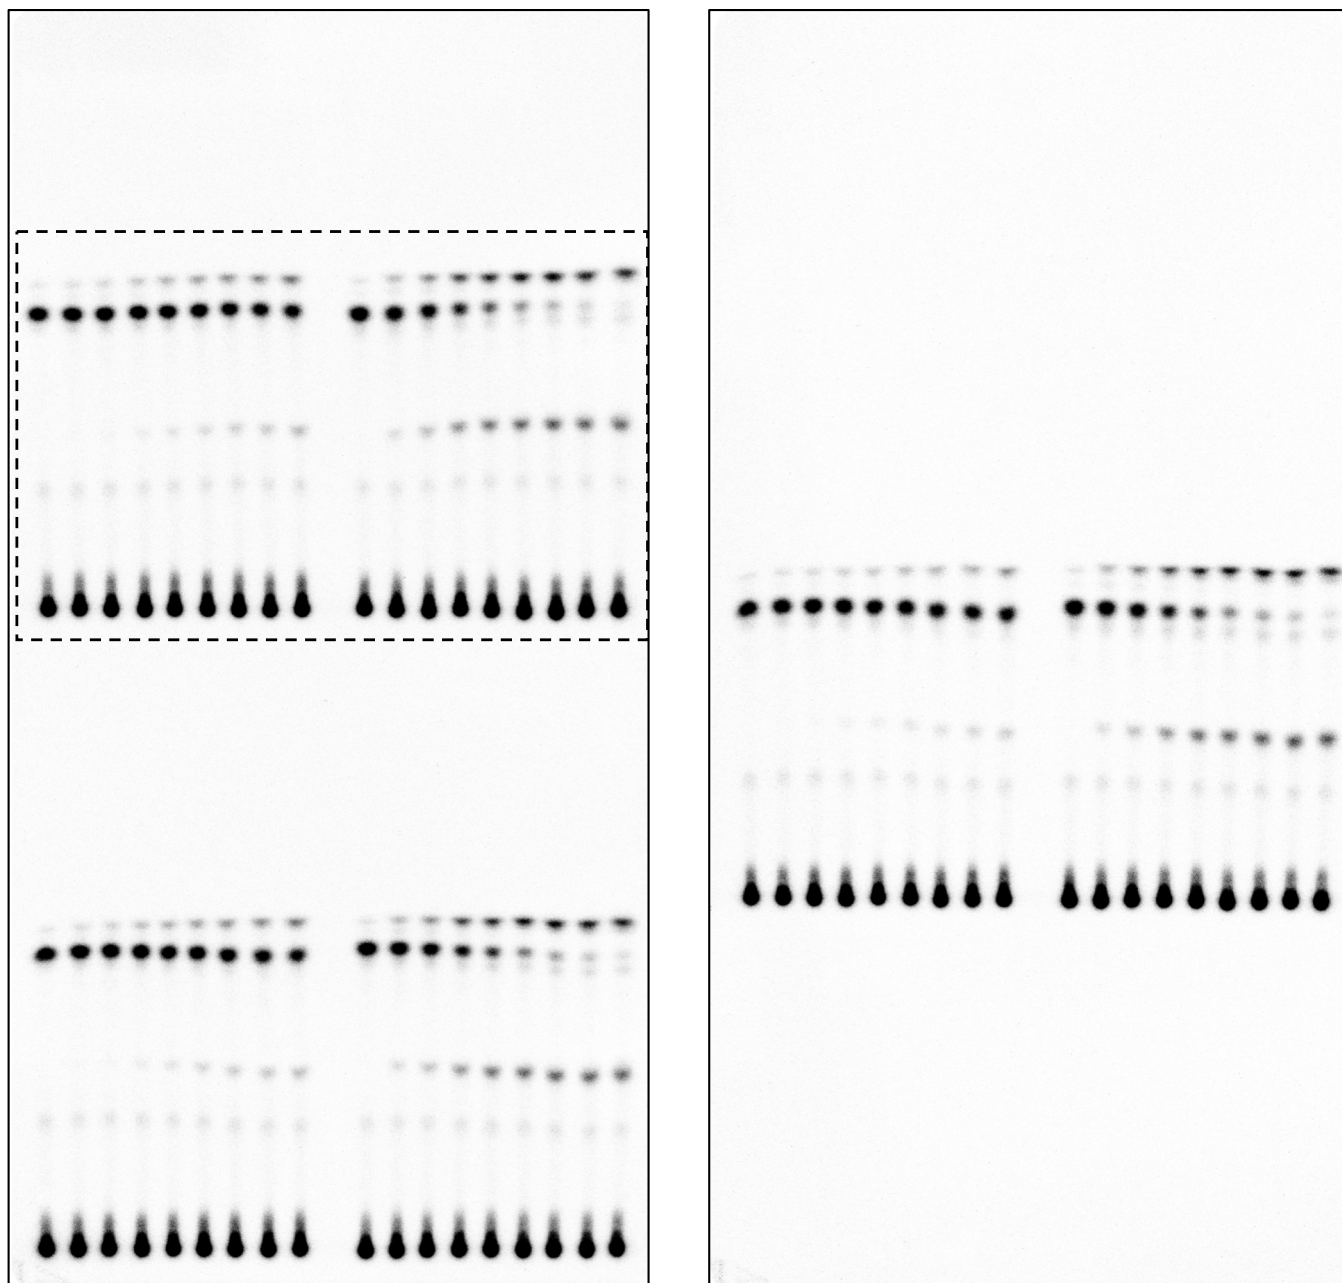

Left hand-side of the page:

Top left: SIRV1 gp29 H47A, no imidazole replicate 1

Top right: SIRV1 gp29 H47A, 500 mM imidazole replicate 1

Bottom left: SIRV1 gp29 H47A, no imidazole replicate 2

Bottom right: SIRV1 gp29 H47A, 500 mM imidazole replicate 2

Right hand-side of the page:

Left: SIRV1 gp29 H47A, no imidazole replicate 3

Right: SIRV1 gp29 H47A, 500 mM imidazole replicate 3

Extended figure 6. Single turnover kinetics of  $cA_4$  degradation by SIRV1 gp29 E88A

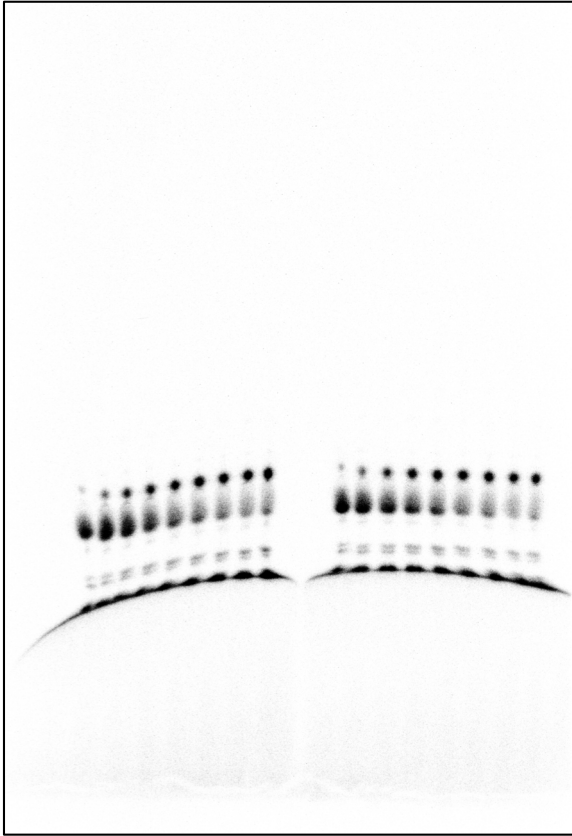

SIRV1 gp29 E88A replicates 1 & 2

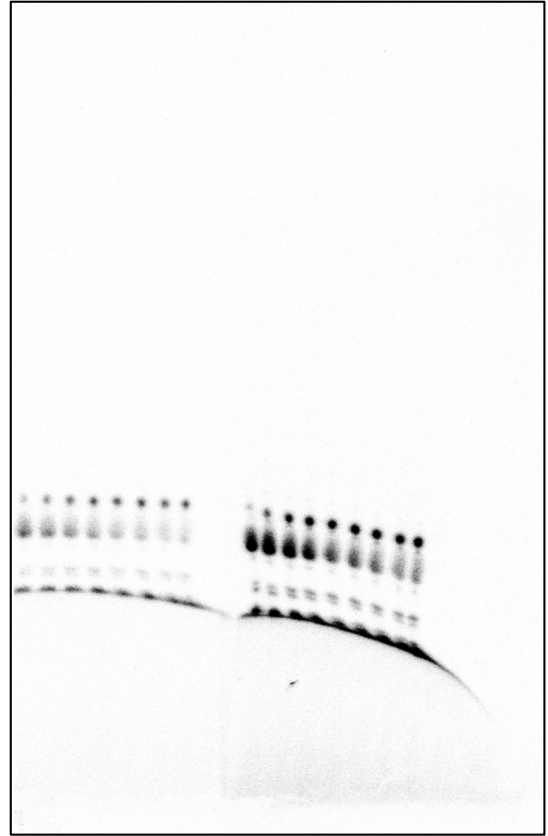

SIRV1 gp29 E88A replicate 3
